# Supplementary material for: Maternal Lopinavir/Ritonavir Is Associated with Fewer Adverse Events in Infants than Nelfinavir or Atazanavir
Source: Hindawi journal article supplement (doi:10.1155/2016/9848041), 2016-01-01
Supplement: f1 [file 9848041.f1.pdf]

**Supplementary Table 1. Comparison of maternal and infant characteristics for lopinavir/ritonavir- and nelfinavir- exposed groups.**

| Characteristic                                                                       | Number with characteristic/Number evaluated <sup>a</sup> (%) <sup>b</sup> |               | p-value     |
|--------------------------------------------------------------------------------------|---------------------------------------------------------------------------|---------------|-------------|
|                                                                                      | Lopinavir/ritonavir                                                       | Nelfinavir    |             |
| Initial maternal CD4 count <sup>c</sup>                                              |                                                                           |               |             |
| Mean cells/mm <sup>3</sup> (range)                                                   | 559 (15-1176)                                                             | 496 (150-769) | 0.27        |
| CD4 <200 cells/mm <sup>3</sup>                                                       | 1/37 (3%)                                                                 | 1/22 (4%)     |             |
| CD4 200-500 cells/mm <sup>3</sup>                                                    | 14/37 (38%)                                                               | 7/22 (32%)    | 0.90        |
| CD4 >500 cells/mm <sup>3</sup>                                                       | 22/37 (59%)                                                               | 14/22 (64%)   |             |
| Mean days of detectable maternal viremia during pregnancy <sup>d</sup> (range)       | 125 (0-274)                                                               | 172 (0-288)   | <b>0.05</b> |
| Maternal viral load detectable at any time during pregnancy <sup>d</sup>             | 29/51 (57%)                                                               | 24/31 (77%)   | 0.09        |
| Entry maternal viral load detectable <sup>c,d</sup>                                  | 25/50 (50%)                                                               | 15/23 (65%)   | 0.11        |
| Maternal viral load detectable ≥90 days after antiretroviral initiation <sup>d</sup> | 5/41 (12%)                                                                | 6/21 (29%)    | 0.16        |
| Maternal viral load detectable within 28 days of delivery <sup>d</sup>               | 3/32 (9%)                                                                 | 2/18 (11%)    | >0.99       |
| Mean days of antenatal antiretroviral therapy during pregnancy (range)               | 170 (40-287)                                                              | 167 (46-287)  | 0.86        |

|                                                                         |                  |                  |       |
|-------------------------------------------------------------------------|------------------|------------------|-------|
| Mean days of lopinavir/ritonavir or nelfinavir during pregnancy (range) | 152 (29-280)     | 156 (28-287)     | 0.81  |
| Lopinavir/ritonavir or nelfinavir initiated prior to conception         | 16/54 (30%)      | 11/36 (31%)      | >0.99 |
| Maternal co-infection with Hepatitis B                                  | 1/45 (2%)        | 1/21 (5%)        | 0.54  |
| Maternal co-infection with Hepatitis C                                  | 4/41 (10%)       | 2/27 (7%)        | >0.99 |
| Mean maternal age at delivery, years (range)                            | 29.6 (20.2-40.6) | 30.7 (21.4-43.3) | 0.37  |
| Maternal parity, mean number of prior deliveries (range)                | 1.6 (0-5)        | 1.6 (0-4)        | 0.91  |
| Male infants (%)                                                        | 24/51 (47%)      | 15/34 (44%)      | 0.83  |
| Infant birthweight                                                      |                  |                  |       |
| Small for gestational age                                               | 7/52 (13%)       | 3/29 (10%)       |       |
| Appropriate for gestational age                                         | 45/52 (87%)      | 25/29 (86%)      | 0.46  |
| Large for gestational age                                               | 0/52 (0%)        | 1/29 (3%)        |       |

<sup>a</sup>Denominator represents the number of infants with available data.

<sup>b</sup>Unless units of measurement are otherwise indicated.

<sup>c</sup>Earliest known maternal laboratory values during pregnancy.

<sup>d</sup>Detectable viral load defined as  $\geq 400$  copies/mL, as this was the limit of detection for the earliest data.

**Supplementary Table 2. Frequency of infant laboratory adverse events at birth associated with exposure to maternal zidovudine vs. abacavir, stavudine, or tenofovir.**

| Laboratory test <sup>a</sup> | Zidovudine <sup>b</sup> | Abacavir, stavudine,      | Odds Ratio (95% CI)    |
|------------------------------|-------------------------|---------------------------|------------------------|
|                              |                         | or tenofovir <sup>b</sup> | p-value                |
| Hgb                          | 10/85 (12%)             | 1/35 (3%)                 | 4.7 (0.58-37.9) p=0.15 |
| ANC                          | 10/67 (15%)             | 10/26 (38%)               | 0.36 (0.10-1.3) p=0.11 |
| Plts                         | 3/80 (4%)               | 1/35 (3%)                 | 1.3 (0.13-13.2) p=0.81 |
| AST                          | 14/76 (18%)             | 2/35 (6%)                 | 3.7 (0.80-17.4) p=0.09 |
| Highest grade AE, all tests  | 32/86 (37%)             | 12/36 (33%)               | 2.1 (0.78-5.4) p=0.14  |

Multivariate analysis using logistic regression was used to model grade  $\geq 1$  AE (yes/no) as a function of maternal antiretroviral treatment. No significant differences were found.

Hgb, hemoglobin; ANC, absolute neutrophil count; Plts, platelets; AST, aspartate aminotransferase; AE, adverse event.

<sup>a</sup>There was 1 adverse event for alanine aminotransferase in the ZDV group, not shown separately but included in the maximum adverse events.

<sup>b</sup>Number of adverse events / Number exposed (%).
